# Supplementary material
Source: publisher figshare collection journal article supplement (https://plos.figshare.com/articles/dataset/_/120686)
Supplement: Supplementary file [file 1]

## Preparation of PANTA transport medium and stabilisation of *M. ulcerans* RNA/DNA in swab samples and culture suspensions

DITM (LMU), KATH and KCCR (KNUST)

v1 03.01.2012

### 1. General considerations

This document describes the standard operating procedure for the preparation of PANTA transport medium for viable *M. ulcerans* in clinical samples and stabilisation of swab samples and culture suspensions for combined mycobacterial RNA/DNA extraction in two steps:

- 1) Preparation of PANTA transport medium for swab samples
- 2) Stabilisation of *M. ulcerans* from culture or swab samples for RNA/DNA extraction

▲ = Note !

### 2. Reagents, material and instruments

#### 2.1 PANTA transport medium

- Dubos Broth Base, 500g (BD, Heidelberg, Germany, ref# 238510)
- Dubos Medium Albumin, 12x20 ml (BD, ref# 230910)
- BBL MGIT PANTA, 6 pcs. (BD, ref# 245114)
- Glycerol (1,2,3-Propantriol), 99.5% p.a., 1L (e.g. Roth, Karlsruhe, Germany, ref# 3783.1)
- H<sub>2</sub>O, 1L
- 2 ml certified RNase/DNase free screw cap tube (Sarstedt, Nümbrecht, Germany, ref# 72.694.100)
- Rack for tubes, sterile 1L sterile glass bottle, Laminar Flow cabinet

#### 2.2 Stabilisation of swab samples for RNA/DNA extraction

- Medical swab, 165 mm, cotton/wood, sterile (Milan, Basel, Switzerland, ref# EBC-150)
- 2 ml tubes with 500 µl PANTA (alternatively LTM)
- RNA Protect Bacteria reagent, 2x100ml (Qiagen, Hilden, Germany, ref# 76506)
- Biosafety cabinet class II
- Centrifuge
- Thermomixer
- Freezer (-20°C/-70°C)

### 3. Preparation of PANTA transport medium

▲ *Work under sterile conditions in a laminar Flow!*

- 1) Distil 850 ml water and filter through sterile bottle top filter.
- 2) Filter glycerol through sterile bottle top filter (this will take a while due to the consistency).

▲ *Glycerol is heat labile!*

- 3) Dissolve 1.5 g Dubos Broth Base in 204 ml distilled water and autoclave for 15 min. at 121°C. Allow the solution to cool down to approx. 50°C before adding 12 ml of filtered glycerol and 24 ml Dubos Medium Albumin.
- 4) Dissolve 2 vials of BBL MGIT PANTA (Polymyxin B, Amphotericin B, Nalidixic acid, Trimethoprim, Azlocillin) in 3 ml filtered distilled water each to obtain PANTA antibiotic mixture.
- 5) For the preparation of PANTA transport medium add 6 ml of PANTA antibiotic mixture to the autoclaved Dubos Broth Base/glycerol mixture under sterile conditions.
- 6) To check sterility add 1 ml PANTA transport medium under sterile conditions to two 2 ml screw cap tubes each and incubate at 36°C for 24h (tube 1) and 1 week (tube 2) respectively. A clear medium indicates sterility while a turbid medium indicates contamination with bacteria (tube 1) and/or fungi

(tube 2). In case of contamination discard the medium and prepare a new batch PANTA transport medium before use.

Store the medium at 4-8°C for max. 3 months in a sterile glass bottle labelled “PANTA transport medium” with the date of preparation. Aliquot 500 µl PANTA transport medium in 2 ml screw cap tubes labelled “PANTA” under sterile conditions.

▲ *Alternatively Liquid Transport Medium (LTM)<sup>1</sup> can be used if routinely applied for cultures in the respective laboratory.*

#### **4. Stabilisation of swab samples for RNA/DNA extraction**

##### **4.1.a. Stabilization of swab samples**

1a) Collect swab(s) from BUD suspected lesions by circling the entire undermined edge of the ulcer according to routine procedure.

2a) Store swab stick in 2 ml tubes containing 500µl PANTA transport medium (alternatively 500µl LTM)

▲ *The swab can be transported at ambient temperature and may be stored for up to 4 weeks at 4°C, however it is recommended to **apply the following steps directly upon arrival** of clinical samples at the laboratory!*

##### **▲ Work in a biosafety cabinet class II**

3a) Add 1 ml RNA Protect Bacteria reagent to each swab sample in 500 µl PANTA transport medium (2:1), vortex vigorously for 10 sec.

4a) Incubate specimens for 5 min. at ambient temperature, vortex every minute for 10 sec.

5a) Inactivate samples at 95°C for 10 min., incubate on ice for 5 min.

6a) Pellet material by centrifugation at 5000g at ambient temperature for 5 min., remove swab stick carefully and discard supernatant, keep samples on ice and continue RNA/DNA extraction with pellet (see protocol S2) or freeze pellets at -20°C for up to 1 month (alternatively at -70°C for up to 12 months).

##### **4.1.b. Stabilization of culture suspension**

1b) Add 1 ml RNA Protect Bacteria reagent to tubes containing 500 µl PANTA transport medium.

##### **▲ Work in a biosafety cabinet class II**

2b) Suspend one loop-full of *M. ulcerans* culture material in the mixture from step 1).

3b) Vortex vigorously for 10 sec.

4b) Incubate suspension at ambient temperature for 5 min., vortex every minute for 10 sec.

5b) Inactivate suspensions at 95°C for 5 min., incubate on ice for 5 min.

6b) Pellet material by centrifugation at 5000g at ambient temperature for 5 min., discard supernatant, keep samples on ice and continue RNA/DNA extraction with pellet (see protocol S2) or freeze pellets at -20°C for up to 1 month (alternatively at -70°C for up to 12 months).

<sup>1</sup>Fine-Needle Aspiration, an Efficient Sampling Technique for Bacteriological Diagnosis of Nonulcerative Buruli Ulcer (2009) Eddyani M, Fraga AG, Schmitt F, Uwizeye C, et al. J Clin Microbiol. 2009 June; 47(6): 1700–1704.
